# Supplementary material for: Victorian Healthcare Experience Survey 2016 – 2018; Evaluation of Interventions to Improve the Patient Experience.
Source: Research Square preprint supplement (doi:10.21203/rs.3.rs-131185/v1), 2020-12-29
Supplement: Supplementary file 1 [file 73ae06679f15df090e5094f3.docx]

Additional file 2

VHES questions mapped to relevant specific outcome measures

| **Outcome measures** |
| --- |
| **Overall patient experience measure (n=1)** |
| Q76 Overall, how would you rate the care you received while in hospital? |
|  |
| **Communication (Staff-Patient) (n=6)** |
| Q21 If you needed to talk to a doctor, did you get the opportunity to do so? |
| Q27 If you needed to talk to a nurse, did you get the opportunity to do so? |
| Q32 Did the staff treating and examining you introduce themselves and their role? |
| Q33 How often did the doctors, nurses and other healthcare professionals caring for you explain things in a way you could understand? |
| Q43 If you had any worries or fears about your condition or treatment, did a health professional discuss them with you? |
| Q77 Do you feel that you were listened to and understood by the people looking after you in hospital? |
|  |
| **Respect and Dignity (n=4)** |
| Q9 How would you rate the politeness and courtesy of admissions staff? |
| Q45 Were you given enough privacy when being examined or treated? |
| Q46 At other times during your hospital stay did you have enough privacy? |
| Q78 Overall, did you feel you were treated with respect and dignity while you were in hospital? |
|  |
| **Emotion Support (n=5)** |
| Q2 How would you rate the politeness and courtesy of staff in the ED? |
| Q22 Were the doctors treating you compassionate? |
| Q28 Were the nurses treating you compassionate? |
| Q44 Do you feel you received enough emotional support from hospital staff during your stay? |
| Q47 Do you think the hospital staff did everything they could to help manage your pain? |
|  |
| **Discharge Planning (n=3)** |
| Q63 Were you given enough notice about when you were going to be discharged? |
| Q64 Did you feel you were involved in decisions about your discharge from hospital? |
| Q65 On the day you left hospital, was your discharge delayed for any reason? |
|  |
| **Treatment and disease education (n=4)** |
| Q38 How much information about your condition and treatment was given to you? |
| Q51 Did you receive sufficient information about any medication you were given while in hospital (e.g. purpose, side effects and how to administer the medication)? |
| Q53 Did a member of staff explain why you needed these test(s) in a way you could understand? |
| Q54 Did a member of hospital staff explain the results of the tests in a way you could understand? |
|  |
| **Physical environment measure (n=3)** |
| Q12 In your opinion, how clean was the hospital room or ward that you were in? |
| Q13 How clean were the toilets and bathrooms that you used in hospital? |
| Q35 Did you see hospital staff wash their hands, use hand gel to clean their hands, or put on clean gloves before examining you? |
