# Supplementary material for: Victorian Healthcare Experience Survey 2016 – 2018; Evaluation of Interventions to Improve the Patient Experience.
Source: Research Square preprint supplement (doi:10.21203/rs.3.rs-131185/v1), 2020-12-29
Supplement: Supplementary file 2 [file cc21de3878acba60c8ecce35.xlsx]

## Sheet: References
	Additional file 1
	CODEBOOK
	Sources of reference in the development of coding of interventions
	Theoretically derived interventions from:
	1. Existing taxonomy from Effective Practice and Organisation of Care (EPOC). EPOC taxonomy										Available at https://epoc.cochrane.org/epoc-taxonomy
	2. Wong, E., Mavondo, F., & Fisher, J. (2020). Patient feedback to improve quality of patient-centred care in public hospitals: a systematic review of the evidence. BMC health services research, 20(1), 530. https://doi.org/10.1186/s12913-020-05383-3
	Interventions in Communication and Responsiveness to patient categories were not found in the EPOC taxonomy, additional definitions were derived from Wong, Mavondo and Fisher (2020).
	Communication: Communications with patients and their carers or between staff members
	Responsiveness to patient: The level of professionalism, competence and support provided by healthcare staff.
	Categories of interventions adopted (adopted from the EPOC taxonomy* and from systematic review on interventions for quality improvement from patient feedback**) for coding are in the coding descriptions

## Sheet: Coding description
		Intervention categories (* = EPOC, **= Wong et. al 2020)	Description
	1	Professional practice*	Role expansion or task shifting*		Expanding tasks undertaken by a cadre of health workers or shifting tasks from one cadre to another, to include tasks not previously part of their scope of practice.
			Length of consultation*		Changes in the length of consultations
			Staffing models*		Interventions to achieve an appropriate level and mix of staff, recruitment and retention of staff, and transitioning of healthcare workers from one environment to another, for example interventions to increase the proportion of healthcare workers in underserved areas.
			Care pathways*		Aim to link evidence to practice for specific health conditions and local arrangements for delivering care.
			Case management*		Introduction, modification or removal of strategies to improve the coordination and continuity of delivery of services i.e. improving the management of one “case” (patient)
			Communication between providers*		Systems or strategies for improving the communication between health care providers, for example systems to improve immunization coverage in LMIC
			Comprehensive assessment*		A multidimensional interdisciplinary diagnostic process focused on determining a person’s medical, psychological and functional capability to ensure that problems are identified, quantified and managed appropriately
			Continuity of care*		Interventions to reduce fragmented care and undesirable consequences of fragmented care, for example by ensuring the responsibility of care is passed from one facility to another so the patient perceives their needs and circumstances are known to the provider.
			Discharge planning*		An individualized plan of discharge to facilitate the transfer of a patient from hospital to a post-discharge setting.
			Disease management*		Programs designed to manage or prevent a chronic condition using a systematic approach to care and potentially employing multiple ways of influencing patients, providers or the process of care
			Integration*		Consolidating the provision of different healthcare services to one (or simply fewer) facilities.
			Packages of care*		Introduction, modification, or removal of packages of services designed to be implemented together for a particular diagnosis/disease, e.g. tuberculosis management guidelines, newborn care protocols.
			Referral systems*		Systems for managing referrals of patients between health care providers
	2	The physical environment**	Physical **		Physical environment, i.e. replacing chairs, layout, adding and changing the physical space
					Sensory environment, i.e. reduction in noise, introducing music, quiet spaces
					Hygeine
					Food
					Sanitation, i.e. clean toilets, beds
					Amenities - access to wifi
					Changes in change physical spaces, i.e change from inpatient to outpatient clinic, ED to specialist clinic for appointment
			Access**		Waiting time
					Clinical access
					Treatment access. E.g. contact to make appt, admission,etc
					Acess to diagnosis
					Delay in admissions
					Failure/delay in visit
	3	Communication**	Staff -staff dialogue**		Systems for information sharing, i.e IT system, patient charts, handover
					Complete and accurate information
					Sharing information, i.e. patient concerns, queries, test results
			Patient-staff dialogue**		Doctor patient-relationship, i.e. introducing themselves, calling patient by name
					Listening to patient and families
					Interpersonal communication
					Explanation to patients
					Agree on care expectations i.e clarify on the care and what to expect from the care process and outcomes
					Invite participation
					Decision sharing
	4	Responsiveness to patient**	Respect and dignity**		Show concern
					Respect for wishes
					Respond to needs
					Sensitive
					Ask preferences
					Dignified service
			Emotional support**		Emotional support
					Acknowledgement
					Empathy
					Caring
			Professionalism**		Attitude of staff
					Competent behaviour
					Staff commitment
	5	Patient Education**	Patient rights**		Rights i.e. Healthcare charter
			Treatment & Disease education**		Treatment options
					Disease education
					Care navigation: i.e. information at point of presentation
